# Supplementary material for: Executive attention deficits after traumatic brain injury reflect impaired recruitment of resources
Source: PubMed Central journal article supplement — Neuroimage Clin. 2017 Jan 12;14:233–41. doi: 10.1016/j.nicl.2017.01.010 (PMC5288490; doi:10.1016/j.nicl.2017.01.010), 2017-01-12

**7. Scalp maps for all thirteen TBI subjects and all twenty-four control subjects:**

**Supplementary Figure 7a. Thirteen TBI subjects spectral power during executive conditions.** The topographic log spectral power was calculated separately for congruent and incongruent trials. Only the 10-20 channels (19) of the 129 recorded channels and four frequency bands are shown. Each of the frequencies shown have a  $\pm 2.5$  Hz width.



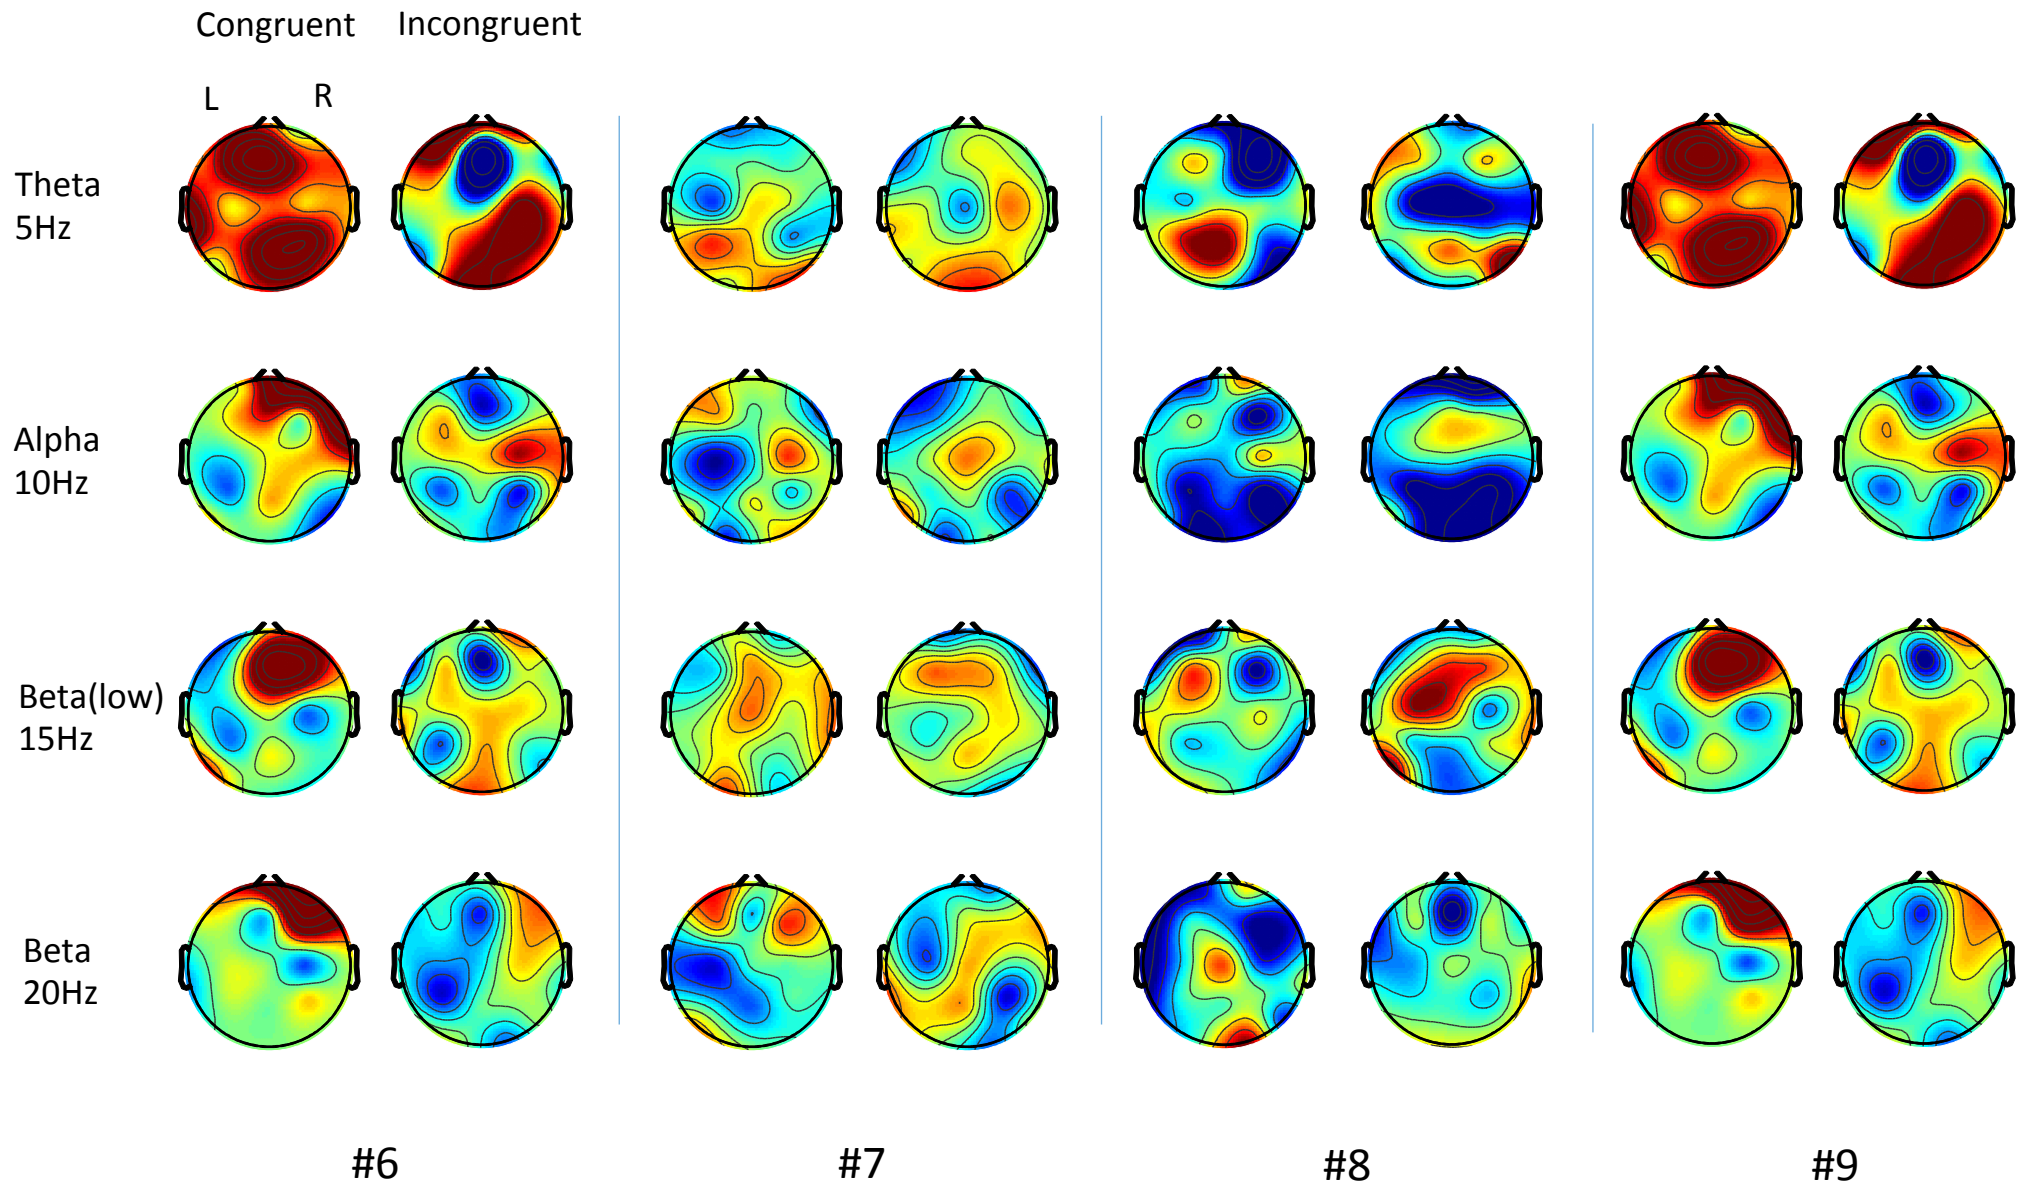

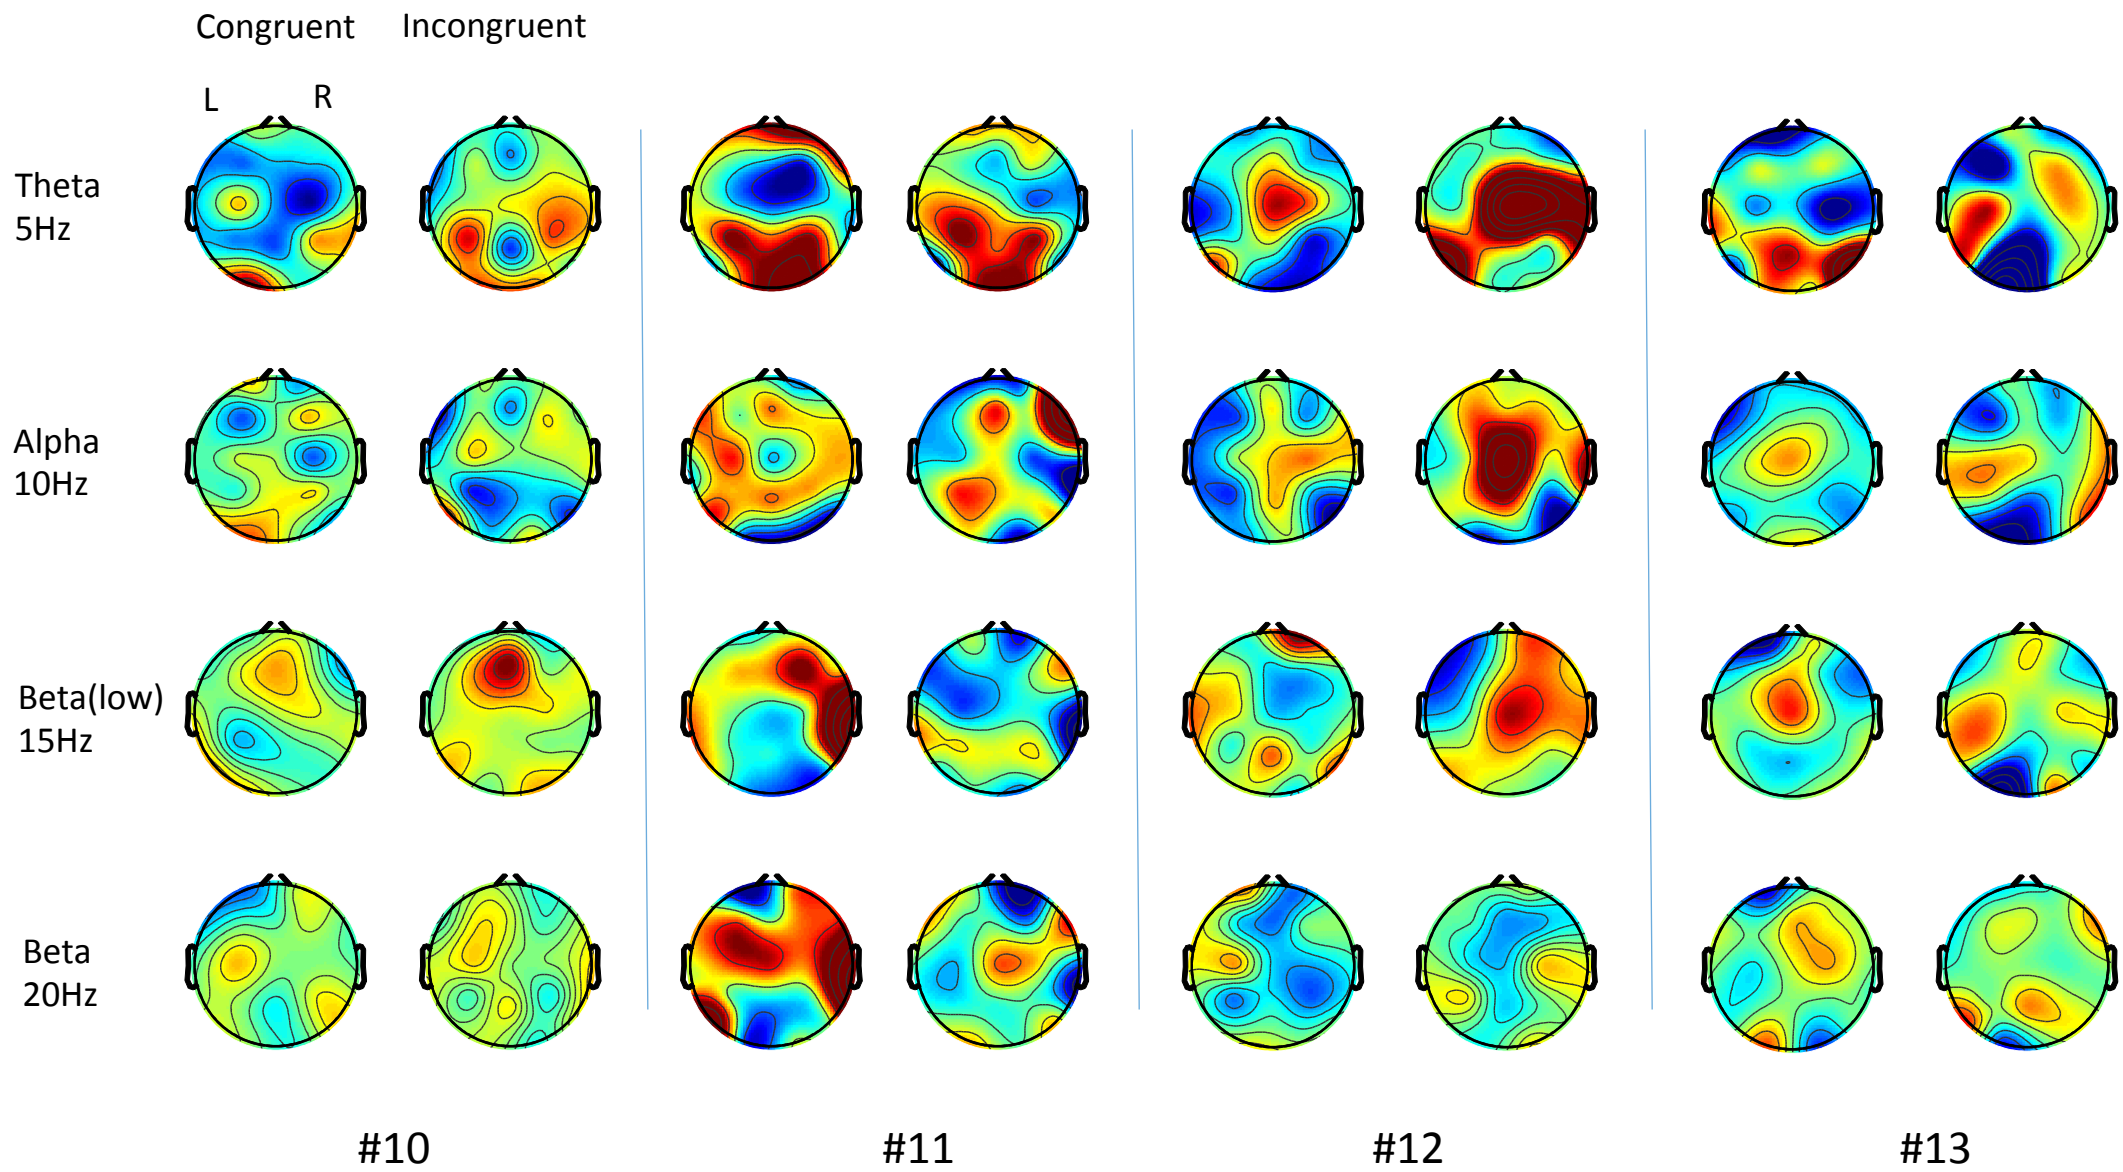

Supplement: mmc2.pdf [file mmc2.pdf]
