# Supplementary material for: Executive attention deficits after traumatic brain injury reflect impaired recruitment of resources
Source: PubMed Central journal article supplement — Neuroimage Clin. 2017 Jan 12;14:233–41. doi: 10.1016/j.nicl.2017.01.010 (PMC5288490; doi:10.1016/j.nicl.2017.01.010), 2017-01-12

**8. TBI subjects: incongruent trials power spectra:**

**Supplementary Figure 8.** Power spectra of the central channels (Fz, Cz, Pz), with error bars (-- 95% confidence limits) for all 13 TBI subjects (incongruent trials) for the 400 msec after target appearance.

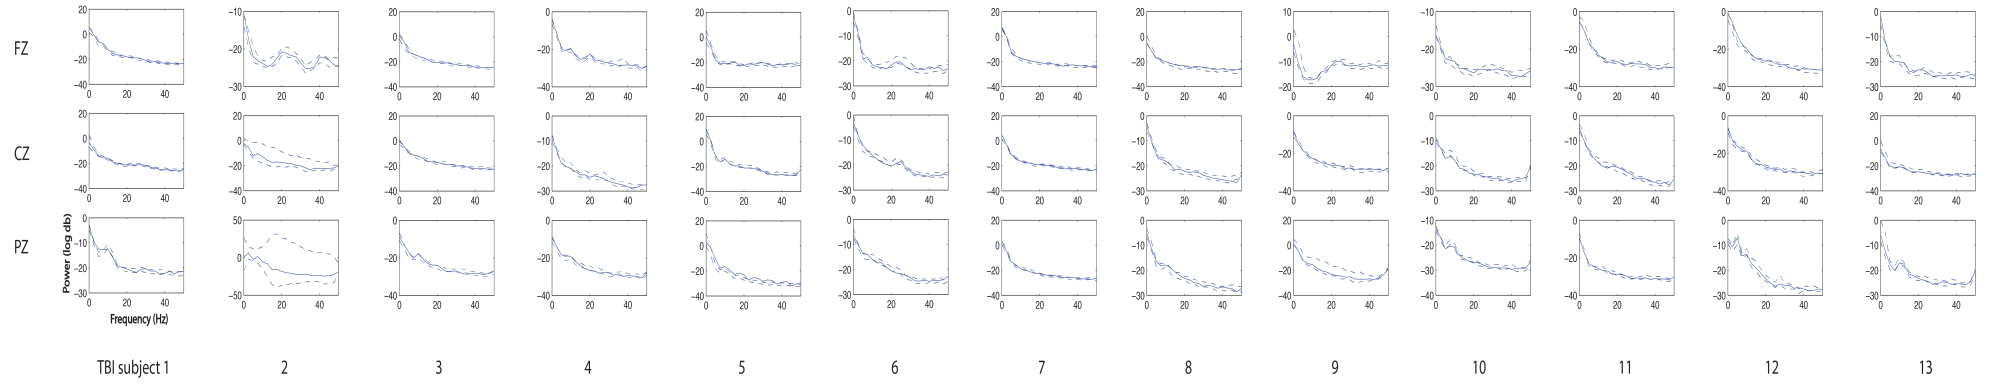

Supplement: mmc4.pdf [file mmc4.pdf]
